# Supplementary material
Source: publisher site journal article supplement (https://www.spandidos-publications.com/53/downloadSupplementary)
Supplement: Supplementary file 1 [file downloadSupplementary]

Figure S1. (A-D), Bodymap of PLCB1, PLCB2, PLCB3 and PLCB4 respectively. Red indicates tumor samples and green indicates normal samples (gepia. cancer-pku.cn/). PLCB, phospholipase C  $\beta$ .

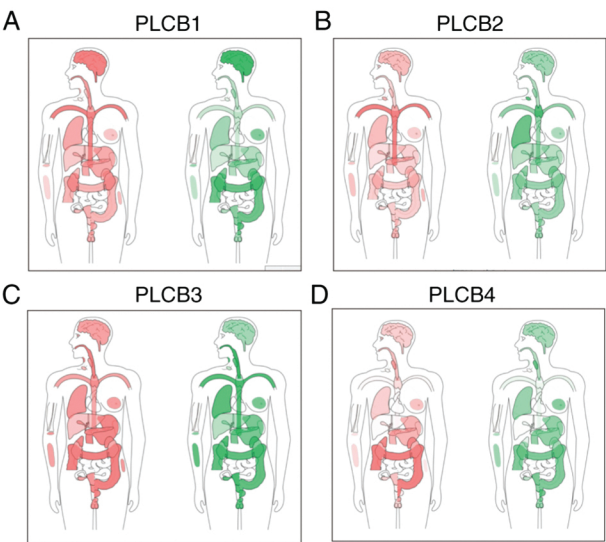

Figure S2. (A-D) Protein expressions of PLCB1, PLCB2, PLCB3, PLCB4 in liver tissue, respectively ([proteatlas.org/ENSG00000182621-PLCB1/tissue/liver#img](https://proteatlas.org/ENSG00000182621-PLCB1/tissue/liver#img); [proteatlas.org/ENSG00000137841-PLCB2/tissue/liver#img](https://proteatlas.org/ENSG00000137841-PLCB2/tissue/liver#img); [proteatlas.org/ENSG00000149782-PLCB3/tissue/liver#img](https://proteatlas.org/ENSG00000149782-PLCB3/tissue/liver#img); [proteatlas.org/ENSG00000101333-PLCB4/tissue/liver#img](https://proteatlas.org/ENSG00000101333-PLCB4/tissue/liver#img)). PLCB, phospholipase C  $\beta$ .

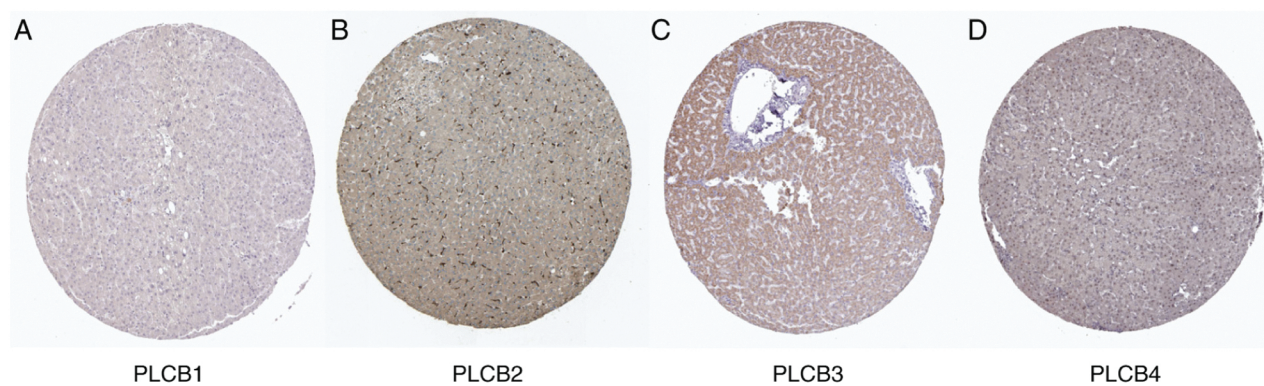

Figure S3. (A-D) Expressions of PLCB1, PLCB2, PLCB3, PLCB4 in different organs, respectively. GTEx portal website. PLCB, phospholipase C  $\beta$ .

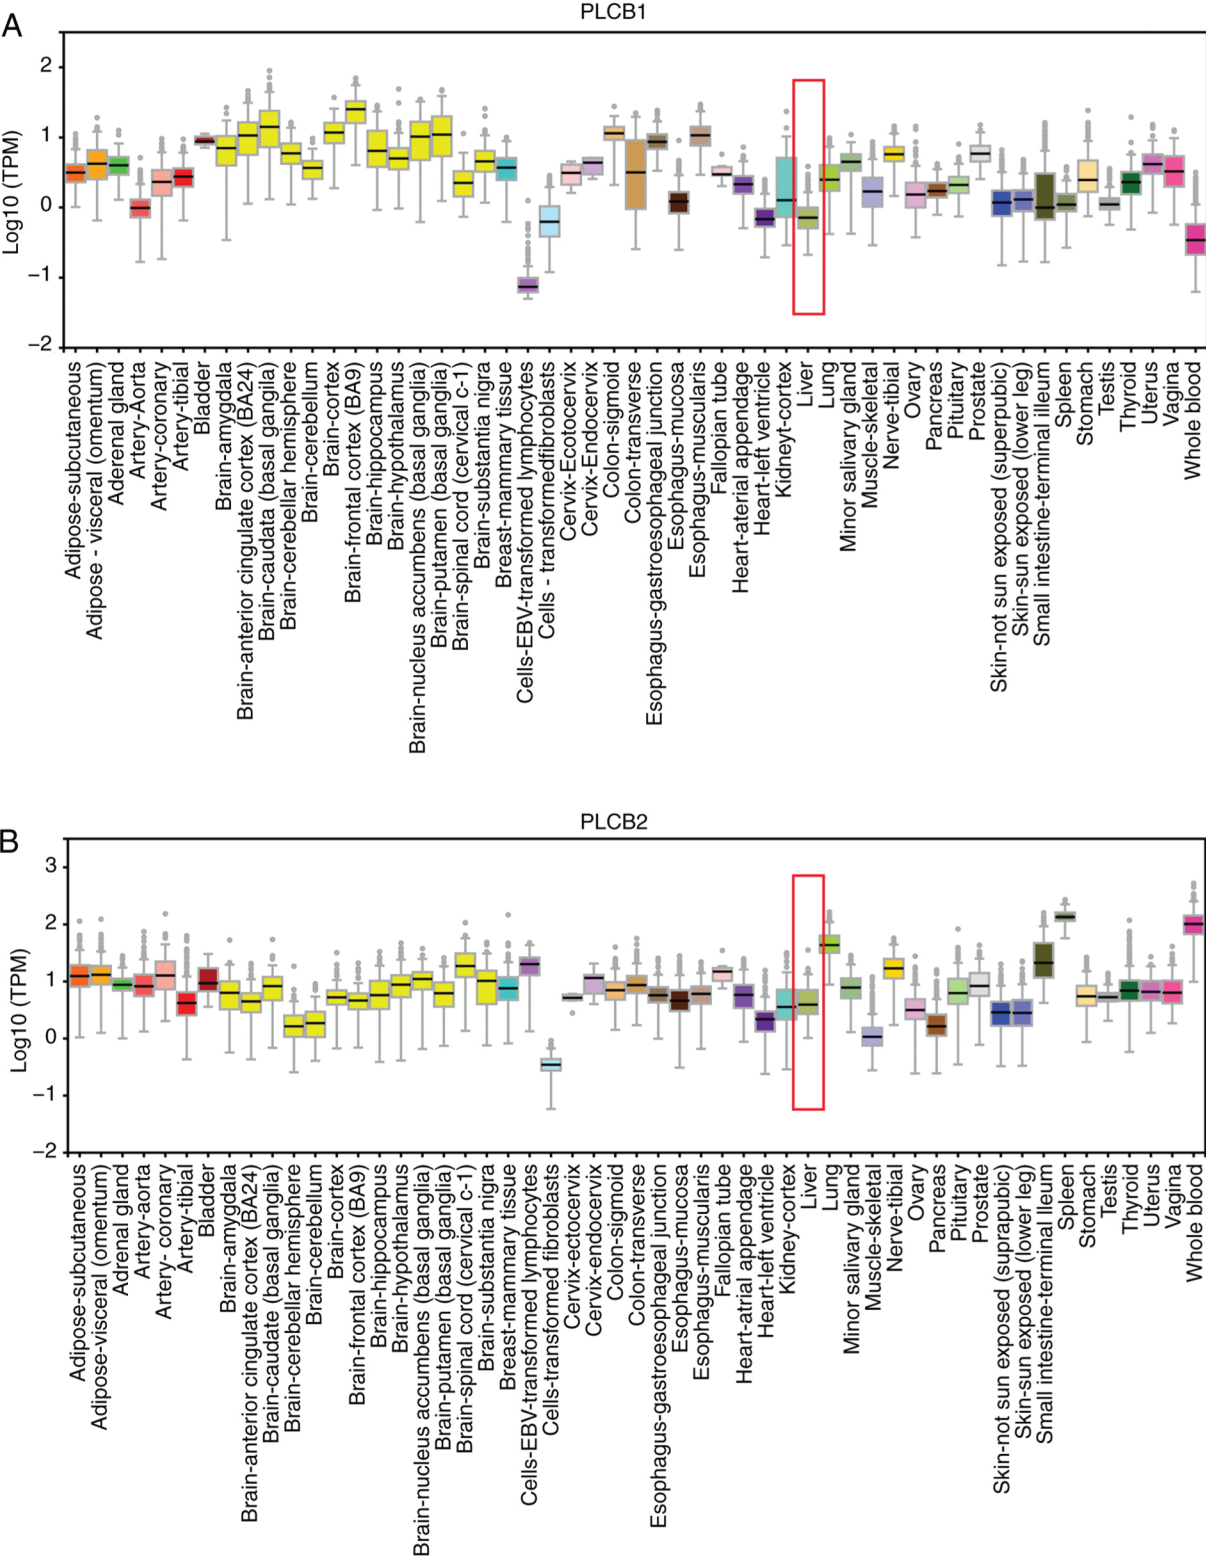

Figure S3. Continued. (A-D) Expressions of PLCB1, PLCB2, PLCB3, PLCB4 in different organs, respectively.

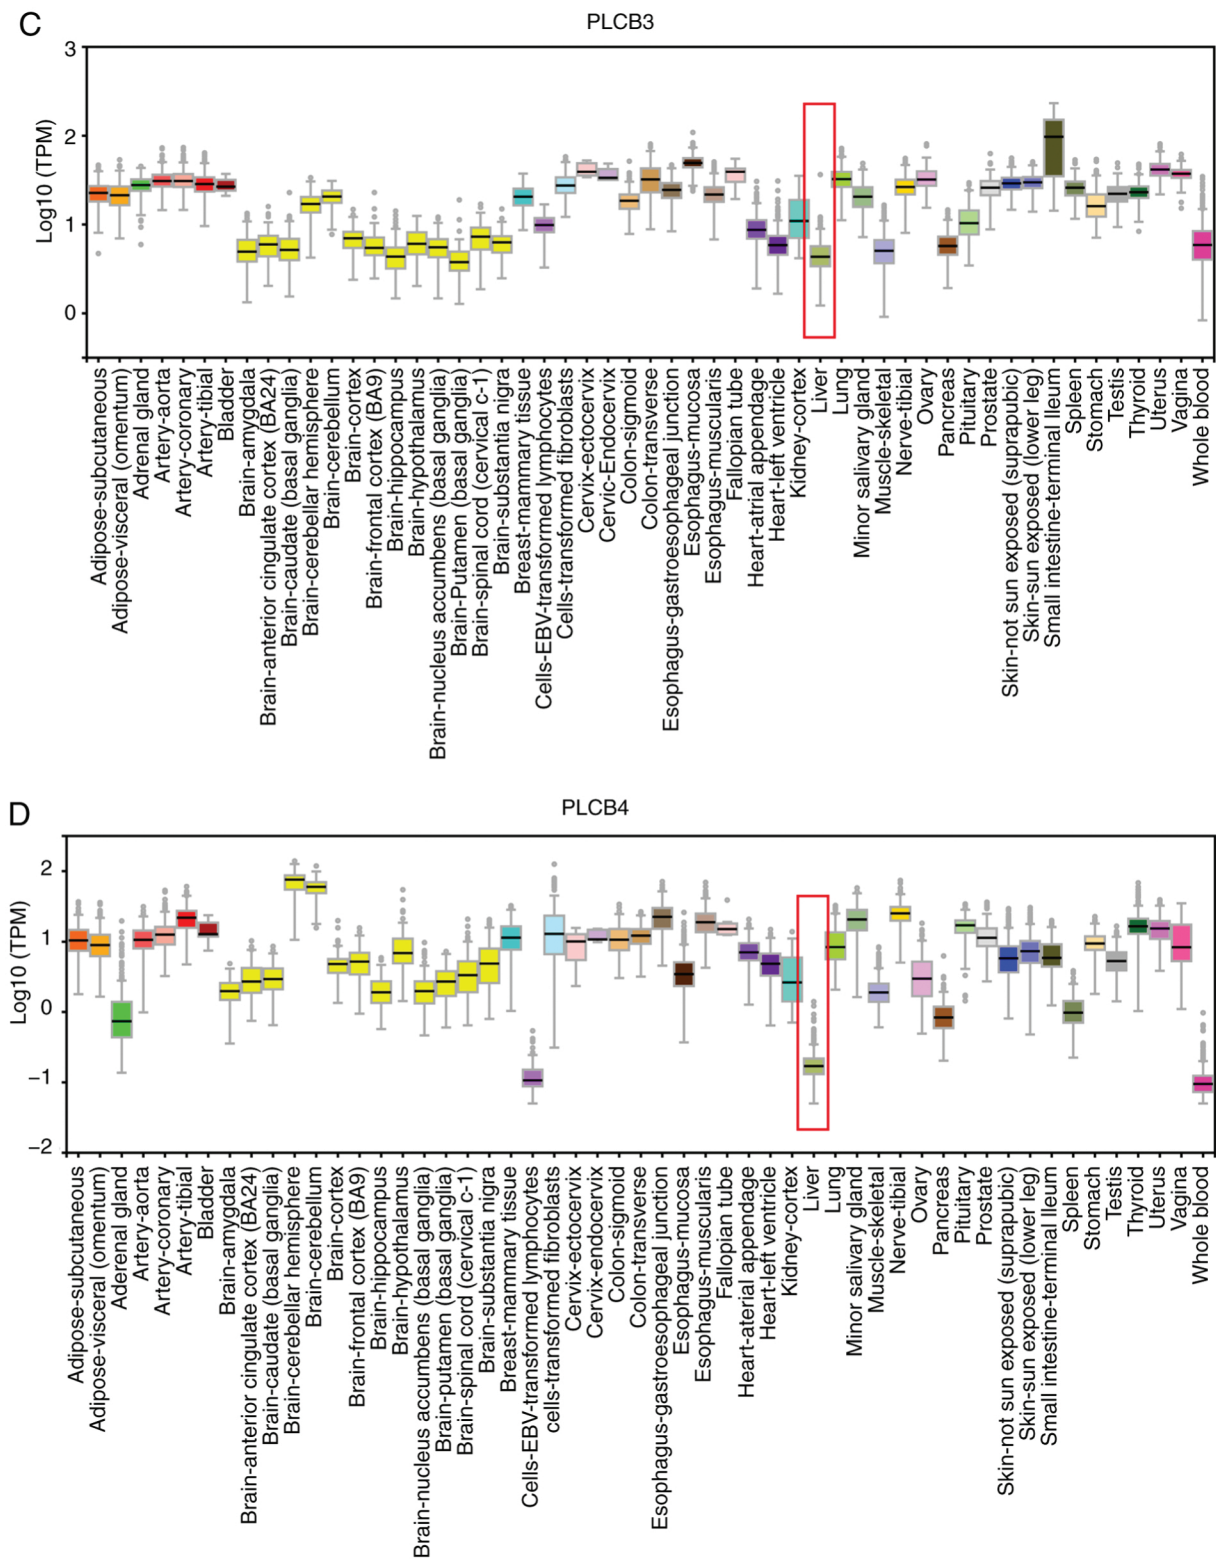



Figure S4. Enriched gene ontologies of phospholipase C  $\beta$ .1-4 genes. (A) Biological process, (B) cellular component, (C) Molecular function. Images generated using Cytoscape software.

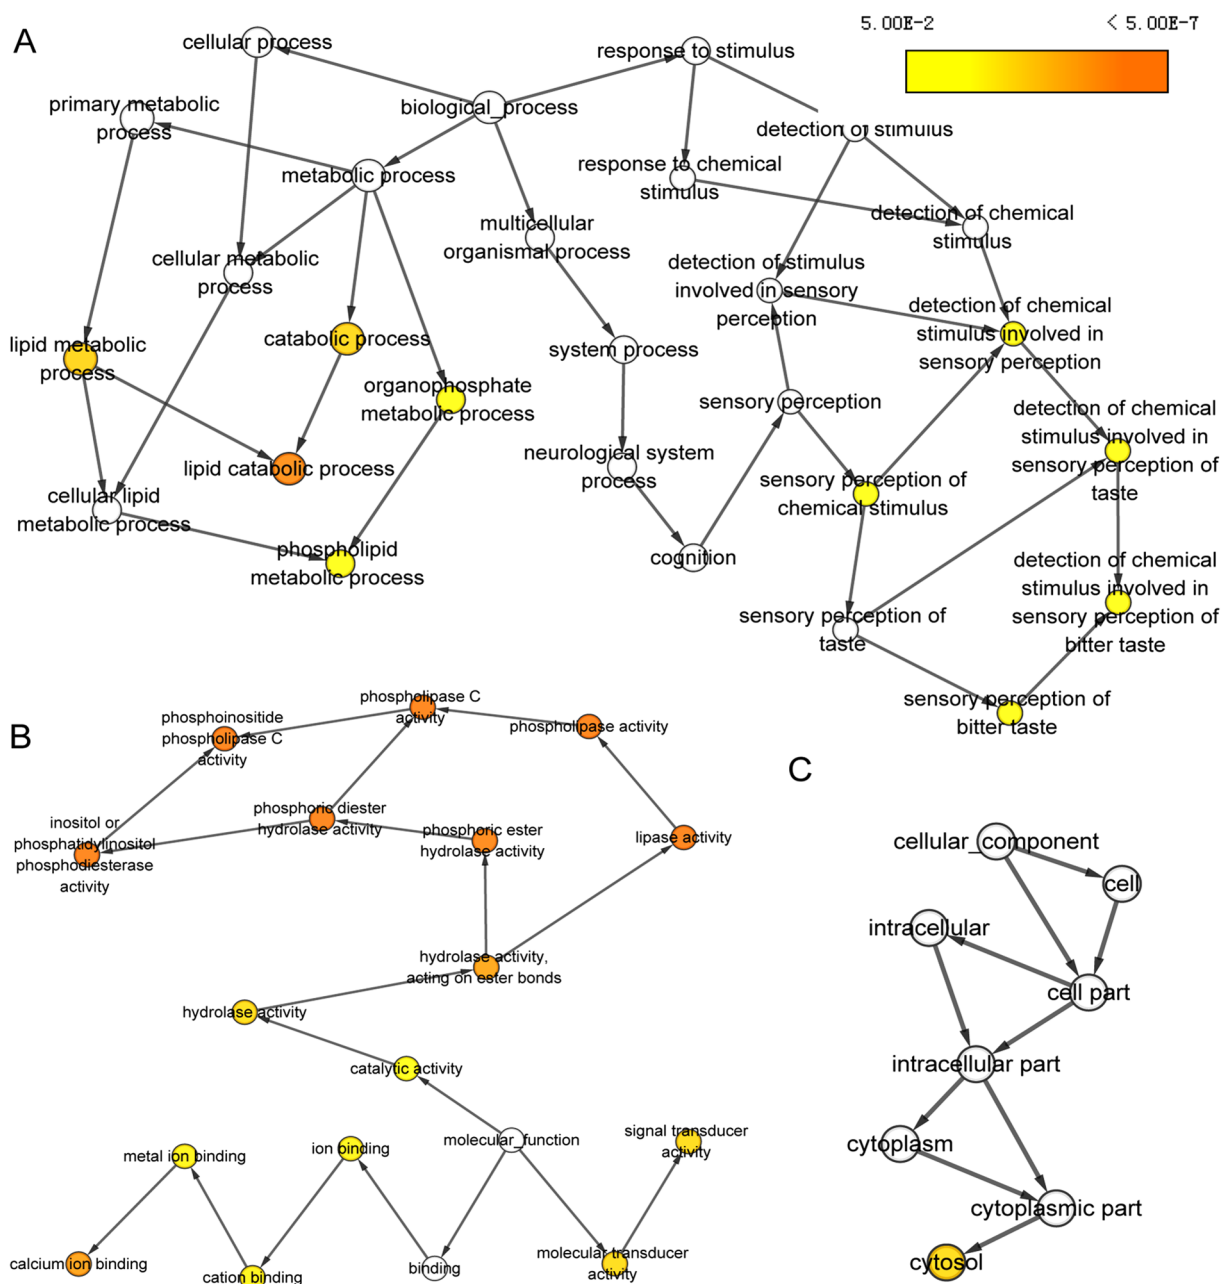

Figure S5. Pathways in cancer associated with phospholipase C  $\beta$  1-4.

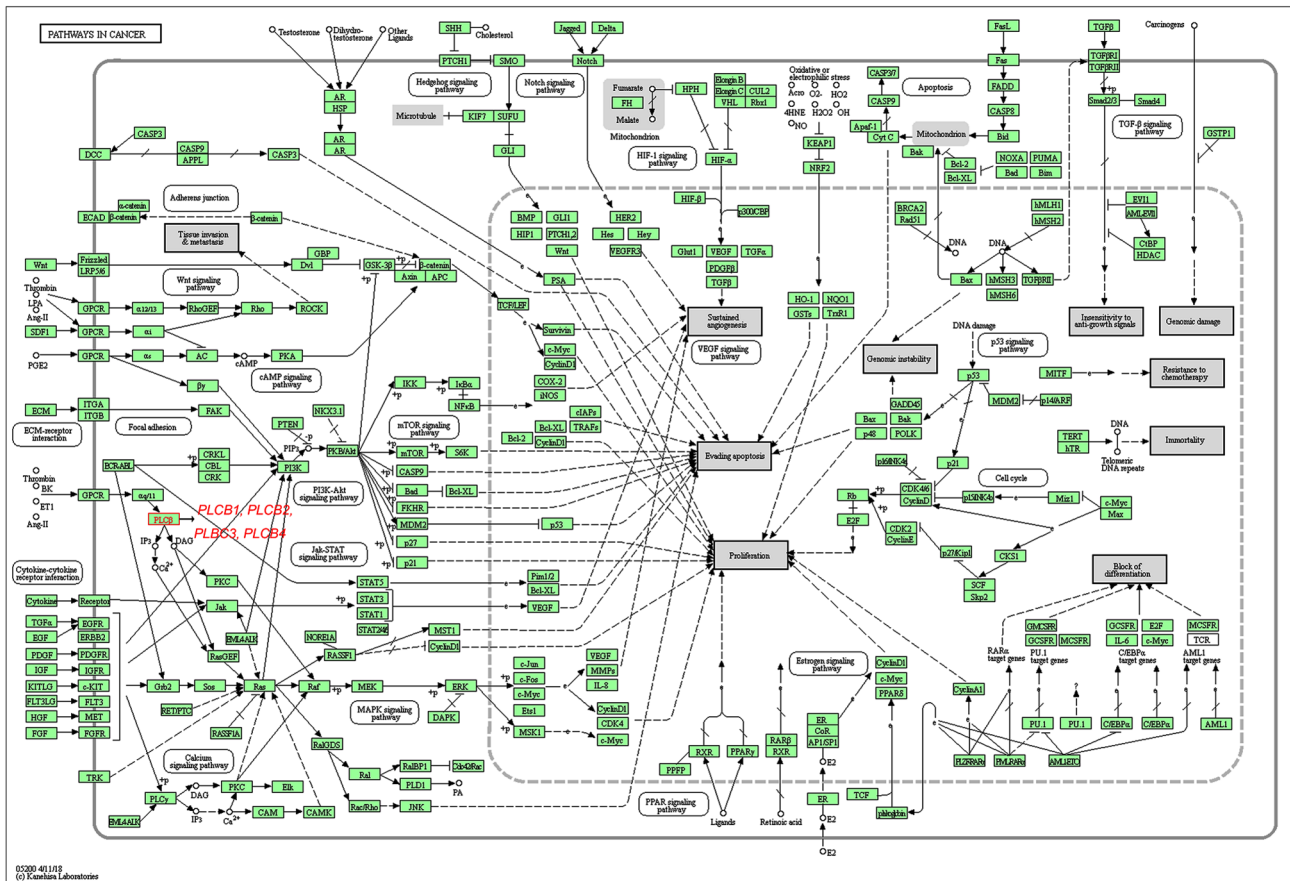

Table SI. Demographic characteristics of 212 patients with HBV-associated hepatocellular carcinoma.

| Variables       | Patients<br>(n=212) | No. of<br>event | Overall survival |                              |                   | P-value | Recurrence-free survival |             |                             | P-value           |
|-----------------|---------------------|-----------------|------------------|------------------------------|-------------------|---------|--------------------------|-------------|-----------------------------|-------------------|
|                 |                     |                 | MST<br>(months)  | HR (95% CI)                  |                   |         | MST<br>(months)          | HR (95% CI) |                             |                   |
| Gender          |                     |                 |                  |                              |                   |         |                          |             |                             |                   |
| Male            | 183                 | 74              | NA               | Ref.                         |                   |         | 106                      | 40.10       | Ref.                        |                   |
| Female          | 29                  | 8               | NA               | 0.587 (0.283-1.218)          | 0.152             |         | 10                       | NA          | <b>0.467 (0.244-0.893)</b>  | <b>0.021</b>      |
| Age (years)     |                     |                 |                  |                              |                   |         |                          |             |                             |                   |
| ≤60             | 175                 | 69              | NA               | Ref.                         |                   |         | 96                       | 45.90       | Ref.                        |                   |
| >60             | 37                  | 13              | NA               | 0.864 (0.478-1.564)          | 0.630             |         | 20                       | 48.00       | 0.974 (0.602-1.578)         | 0.916             |
| HBV             |                     |                 |                  |                              |                   |         |                          |             |                             |                   |
| AVR-CC          | 56                  | 25              | NA               | Ref.                         |                   |         | 35                       | 28.80       | Ref.                        |                   |
| CC              | 156                 | 57              | NA               | 0.747 (0.467-1.196)          | 0.225             |         | 81                       | 51.10       | 0.751 (0.505-1.117)         | 0.158             |
| Tumor size (cm) |                     |                 |                  |                              |                   |         |                          |             |                             |                   |
| ≤5              | 137                 | 46              | NA               | Ref.                         |                   |         | 73                       | 51.10       | Ref.                        |                   |
| >5              | 74                  | 36              | 53.30            | <b>1.975 (1.274-3.060)</b>   | <b>0.002</b>      |         | 43                       | 28.40       | 1.409 (0.966-2.056)         | 0.075             |
| Cirrhosis       |                     |                 |                  |                              |                   |         |                          |             |                             |                   |
| Yes             | 195                 | 80              | NA               | Ref.                         |                   |         | 111                      | 37.90       | Ref.                        |                   |
| No              | 17                  | 2               | NA               | <b>0.231 (0.057-0.939)</b>   | <b>0.041</b>      |         | 5                        | NA          | <b>0.383 (0.156-0.938)</b>  | <b>0.036</b>      |
| Multinodular    |                     |                 |                  |                              |                   |         |                          |             |                             |                   |
| Yes             | 45                  | 23              | 47.90            | Ref.                         |                   |         | 26                       | 28.70       | Ref.                        |                   |
| No              | 167                 | 59              | NA               | 0.622 (0.384-1.008)          | 0.054             |         | 90                       | 49.10       | 0.823 (0.531-1.274)         | 0.382             |
| AFP (ng/ml)     |                     |                 |                  |                              |                   |         |                          |             |                             |                   |
| ≤300            | 115                 | 39              | NA               | Ref.                         |                   |         | 62                       | 48.00       | Ref.                        |                   |
| >300            | 94                  | 43              | NA               | <b>1.546 (1.002-2.385)</b>   | <b>0.049</b>      |         | 54                       | 35.20       | 1.200 (0.833-1.728)         | 0.328             |
| BCLC stage      |                     |                 |                  |                              |                   |         |                          |             |                             |                   |
| 0               | 20                  | 2               | NA               | Ref.                         | <b>&lt;0.0001</b> |         | 6                        | NA          | Ref.                        | <b>&lt;0.0001</b> |
| A               | 143                 | 48              | NA               | <b>4.119 (1.001-16.951)</b>  | <b>0.050</b>      |         | <b>74</b>                | 51.60       | 2.050 (0.892-4.711)         | 0.091             |
| B               | 22                  | 12              | 46.10            | <b>8.992 (2.005-40.320)</b>  | <b>0.004</b>      |         | <b>15</b>                | 26.90       | <b>4.019 (1.550-10.421)</b> | <b>0.004</b>      |
| C               | 27                  | 20              | 13.60            | <b>18.993 (4.419-81.632)</b> | <b>&lt;0.0001</b> |         | 21                       | 8.90        | <b>6.163 (2.477-15.333)</b> | <b>&lt;0.0001</b> |

Ref., reference value (1); HR, hazard ratio; 95% CI, 95% confidence interval; HBV, hepatitis B virus; AVR-CC, acute viral replication-chronic carrier; CC, chronic carrier; AFP, AFP,  $\alpha$ -fetoprotein; BCLC, Barcelona Clinic Liver Cancer. Bold indicates significant P-values.
